# Supplementary material for: Epidemiology of paediatric gastrointestinal colonisation by extended spectrum cephalosporin-resistant Escherichia coli and Klebsiella pneumoniae isolates in north-west Cambodia
Source: Springer Nature journal article supplement (doi:10.1186/s12866-019-1431-9), 2019-03-12

a) *E. coli*

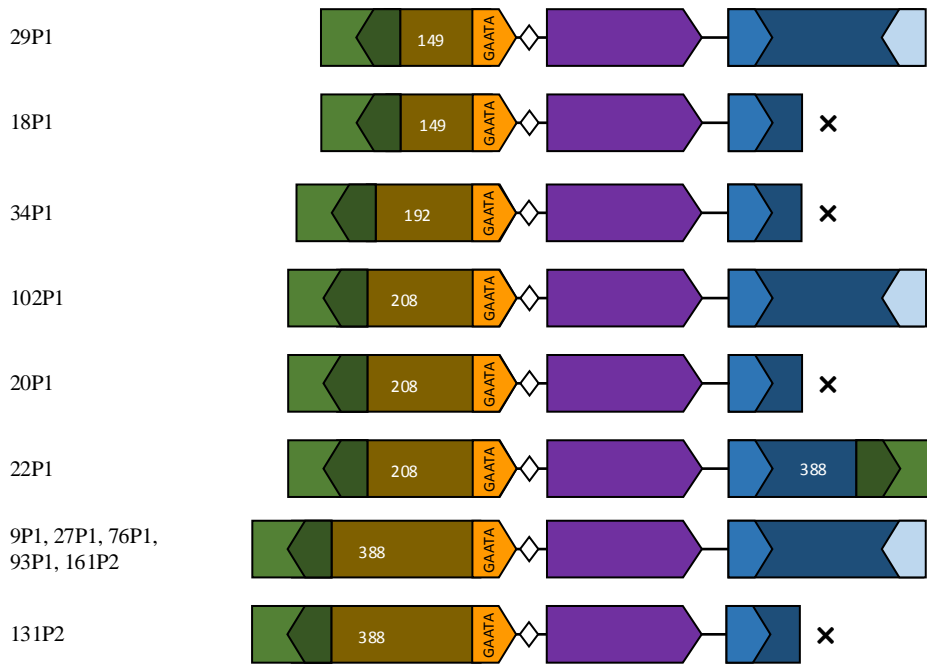

b) *K. pneumoniae*

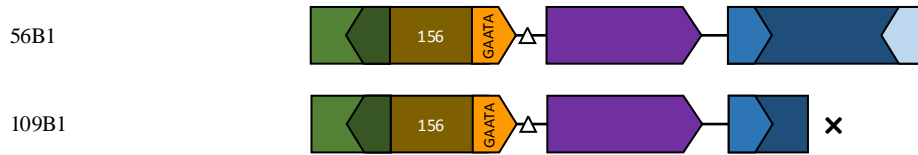

**Key**

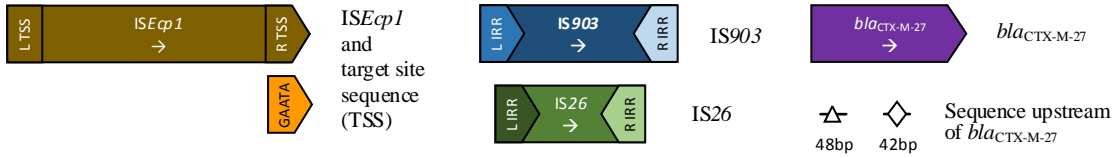

Supplement: MOESM4 [file 12866_2019_1431_MOESM4_ESM.pdf]
