# Supplementary material for: Epidemiology of paediatric gastrointestinal colonisation by extended spectrum cephalosporin-resistant Escherichia coli and Klebsiella pneumoniae isolates in north-west Cambodia
Source: Springer Nature journal article supplement (doi:10.1186/s12866-019-1431-9), 2019-03-12
Supplement: MOESM5 [file 12866_2019_1431_MOESM5_ESM.pdf]

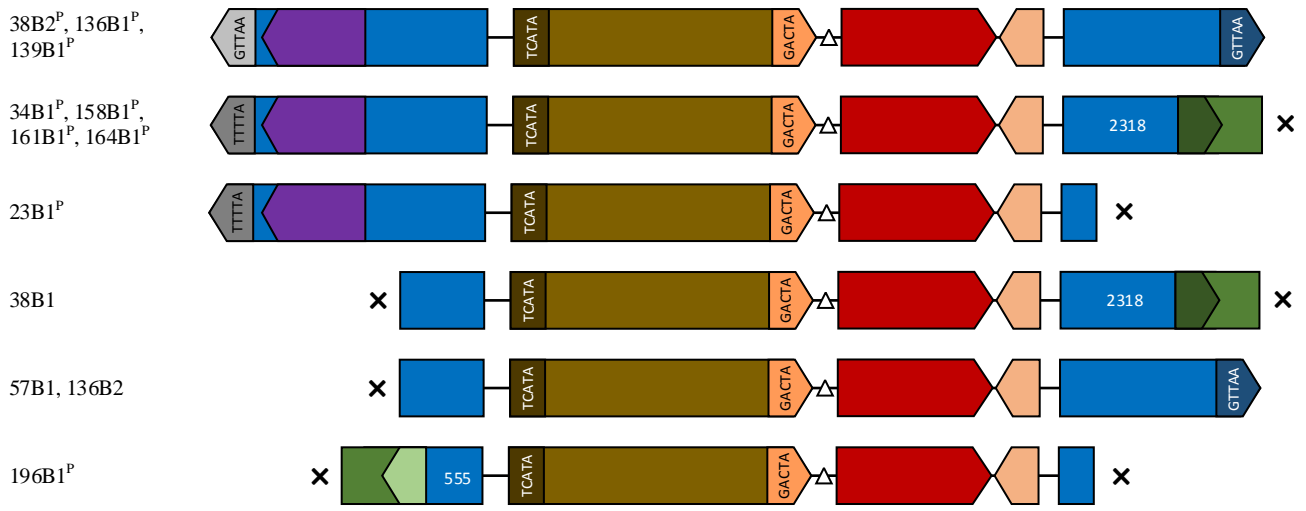

### Key

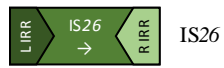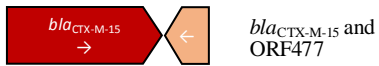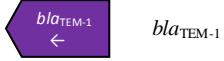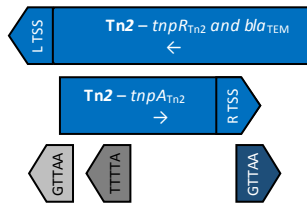

Tn2 flanking  
sequence and  
target site  
sequences  
(TSS)

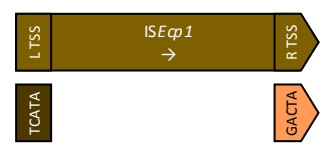

*ISEcp1*  
and  
target site  
sequences  
(TSS)

Sequence upstream of  
*bla*<sub>CTX-M-15</sub>
