# Supplementary material for: Epidemiology of paediatric gastrointestinal colonisation by extended spectrum cephalosporin-resistant Escherichia coli and Klebsiella pneumoniae isolates in north-west Cambodia
Source: BMC Microbiol. 2019 Mar 12;19:59. doi: 10.1186/s12866-019-1431-9 (PMC6417137; doi:10.1186/s12866-019-1431-9)
Supplement: Supplementary file 2 — Table S3. Detail of genetic contexts for blaCTX-M in sequenced isolates. (XLSX 22 kb) [file 12866_2019_1431_MOESM2_ESM.xlsx]

## Sheet: Sheet1
comid	species	isolate_name	ctxm_summary	length	on_contig_review	L ISSwi1 DTR	L ISSwi1_truncated_by	L ISSwi1_length	ISEcp1 L DTR	L ISEcp_truncated_by	ISEcp1 R DTR	ISEcp1_length	upstream_seq_ctxm_length	R ISSwi1 DTR	R ISSwi1_truncated_by	R ISSwi1_length	IS903B_element_length	IS903B_element L IRR DTR (downstream)	IS903B_L_truncated_by	other_notes
C00022445	kpne	20B1	14	21583	plasmid	na	na	na	TAGCA	-	GAATA	1656	42	na	na	na	885	-	contig break
C00022040	kpne	178B2	14	23972	plasmid	na	na	na	TAGCA	-	GAATA	1656	42	na	na	na	1054 (17Ns/- in middle)	ACGCG	-
C00021946	kpne	38B1	15	6471	unknown	-	truncated contig	1157	TCATA	-	GACTA	1656	48	-	IS26 L IRR	2318	na	na	na
C00021947	kpne	38B2	15	47622	plasmid	GTTAA	-	2125	TCATA	-	GACTA	1656	48	GTTAA		2902	na	na	na
C00021959	kpne	57B1	15	8052	unknown	-	truncated contig	2078	TCATA	-	GACTA	1656	48	GTTAA		2902	na	na	na
C00022005	kpne	136B1	15	47610	plasmid	GTTAA	-	2125	TCATA	-	GACTA	1656	48	GTTAA		2902	na	na	na
C00022006	kpne	136B2	15	8068	unknown	-	truncated contig	2086	TCATA	-	GACTA	1656	48	GTTAA		2902	na	na	na
C00022009	kpne	139B1	15	47610	plasmid	GTTAA	-	2125	TCATA	-	GACTA	1656	48	GTTAA		2902	na	na	na
C00022022	kpne	158B1	15	14162	plasmid	TTTTA	-	2125	TCATA	-	GACTA	1656	48	-	IS26 L IRR	2318	na	na	na
C00022025	kpne	161B1	15	11058	plasmid	TTTTA	-	2125	TCATA	-	GACTA	1656	48	-	IS26 L IRR	2318	na	na	na
C00022028	kpne	164B1	15	13911	plasmid	TTTTA	-	2125	TCATA	-	GACTA	1656	48	-	IS26 L IRR	2318	na	na	na
C00022052	kpne	196B1	15	3866	plasmid	-	IS26 R IRR	555	TCATA	-	GACTA	1656	48	-	truncated contig	335	na	na	na
C00022448	kpne	23B1	15	11804	plasmid	TTTTA	-	2125	TCATA	-	GACTA	1656	48	-	truncated contig	355	na	na	na
C00022460	kpne	34B1	15	14150	plasmid	TTTTA	-	2125	TCATA	-	GACTA	1656	48	-	IS26 L IRR	2318	na	na	na
C00022046	kpne	56B1	27	3972	unknown	na	na	na	-	IS26 L IRR	GAATA	156	48	na	na	na	1054	ACGCG	-
C00021993	kpne	109B1	27	1273	unknown	na	na	na	-	IS26 L IRR	GAATA	156	48	na	na	na	95	-	contig break
C00021943	ecol	38P1	truncated 15 - context not assessed	1945, 1107	-	-	-	-	-	-	-	-	-	-	-	-	na	na	na
C00022036	ecol	181P2	15	2427	unknown	-	-	-	-	truncated contig	TTTCA	94	127	-	IS26 L IRR	Tn3/TEM-like	na	na	na
C00022429	ecol	5P1	15	3764	unknown	-	-	-	-	IS26 L IRR	GACTA	24	48	-	IS26 L IRR	2318	na	na	na
C00022459	ecol	34P2	15	3743	unknown	-	-	-	-	truncated contig	GACTA	92	48	-	IS26 L IRR	2318	na	na	na
C00021991	ecol	109P1	15	3755	unknown	-	-	-	-	truncated contig	GACTA	98	48	-	IS26 L IRR	2318	na	na	na
C00022051	ecol	196P2	15	3755	unknown	-	-	-	-	truncated contig	GACTA	98	48	-	IS26 L IRR	2318	na	na	na
C00022063	ecol	94P1	15	1511	unknown	-	-	-	-	truncated contig	GACTA	98	48	-	truncated contig	170	na	na	na
C00022020	ecol	158P1	15	3787	unknown	-	-	-	-	truncated contig	GACTA	114	48	-	IS26 L IRR	2318	na	na	na
C00022014	ecol	144P1	15	3799	unknown	-	-	-	-	truncated contig	GACTA	120	48	-	IS26 L IRR	2318	na	na	na
C00022054	ecol	63P1	15	1608	unknown	-	-	-	-	truncated contig	GACTA	309	48	-	truncated contig	56	na	na	na
C00021942	ecol	36P2	15	3353	unknown	-	-	-	-	IS26 L IRR	GACTA	497	48	-	IS26 R IRR	1425	na	na	na
C00021964	ecol	65P1	15	4246	unknown	-	-	-	-	IS26 L IRR	GACTA	497	48	-	IS26 l IRR	2318	na	na	na
C00022001	ecol	128P1	15	1813	unknown	-	-	-	-	truncated contig	GACTA	497	48	-	truncated contig	73	na	na	na
C00022042	ecol	166P1	15	4246	unknown	-	-	-	-	IS26 L IRR	GACTA	497	48	-	IS26 L IRR	2318	na	na	na
C00022047	ecol	189P1	15	3357	unknown	-	-	-	-	IS26 L IRR	GACTA	497	48	-	IS26 R IRR	1425	na	na	na
C00021973	ecol	83P1	15	2477	unknown	-	-	-	-	IS26 L IRR	TTTCA	524	127	-	truncated contig	Tn3/TEM-like (73bp of blaTEM-1)	na	na	na
C00022017	ecol	155P2	15	2958	unknown	-	-	-	-	IS26 L IRR	TTTCA	524	127	-	IS26 L IRR	Tn3/TEM-like	na	na	na
C00022050	ecol	196P1	15	2959	unknown	-	-	-	-	IS26 L IRR	TTTCA	524	127	-	IS26 L IRR	Tn3/TEM-like	na	na	na
C00022461	ecol	35P1	15	4821	unknown	-	-	-	-	IS26 R IRR	GACTA	1067	48	-	IS26 L IRR	2318	na	na	na
C00022049	ecol	192P1	15	4929	unknown	-	-	-	-	IS26 R IRR	GACTA	1173	48	-	IS26 L IRR	2318	na	na	na
C00021972	ecol	68P2	15	2779	unknown		-	-	-	truncated contig	GACTA	1177	48	-	truncated contig	359	na	na	na
C00021987	ecol	107P1	15	2493	unknown	-	-	-	-	truncated contig	GACTA	1177	48	-	truncated contig	73	na	na	na
C00022029	ecol	164P1	15	2493	unknown	-	-	-	-	truncated contig	GACTA	1177	48	-	truncated contig	73	na	na	na
C00022059	ecol	89P1	15	2493	unknown	-	-	-	-	truncated contig	GACTA	1177	48	-	truncated contig	73	na	na	na
C00021989	ecol	108P1	15	3099	unknown	-	-	-	-	IS26 L IRR	GACTA	1421	48	-	IS26 R IRR	216	na	na	na
C00021967	ecol	67P1	15	5130	unknown	-	-	-	-	IS26 L IRR	GACTA	1489	48	-	IS26 L IRR	2212	na	na	na
C00022426	ecol	3P1	15	5138	unknown	-	-	-	-	IS26 L IRR	GACTA	1489	48	-	IS26 L IRR	2212	na	na	na
C00021944	ecol	38P2	15	6113	unknown	-	IS26 R IRR	703	TCATA	-	GACTA	1656	48	-	IS26 L IRR	2318	na	na	na
C00021953	ecol	44P1	15	110382	chromosomal	-	unknown seq	3	TAATA	-	GACTA	1656	48	-	IS26 L IRR	2318	na	na	na
C00021984	ecol	68P1	15	9273	unknown	-	truncated contig	978	TCATA	-	GACTA	1656	48	GAAAA	-	2902	na	na	na
C00022012	ecol	143P1	15	5978	unknown	-	-	-	-	-	GACTA	1656	48	-	unknown seq	73	na	na	na
C00022018	ecol	157P1	15	6910	unknown	-	truncated contig	984	TCATA	-	GACTA	1656	48	GAAAA	-	2902	na	na	na
C00022019	ecol	157P2	15	11533	likely plasmid	-	truncated contig	1169	TCATA	-	GACTA	1656	48	GAAAA	-	2902	na	na	na
C00022021	ecol	158P2	15	4639	unknown	-	IS26 R IRR	703	TCATA	-	GACTA	1656	48	-	IS26 L IRR	818	na	na	na
C00022023	ecol	161P1	15	22711	likely plasmid	TTTTA	-	2125	TCATA	-	GACTA	1656	48	TAAAA	-	2902	na	na	na	full CTX-M/Tn3 complex
C00022031	ecol	165P1	15	11688	unknown	-	unknown seq	2116	TCATA	-	GACTA	1656	48	-	IS26 L IRR	2318	na	na	na
C00022038	ecol	151P1	15	3163	unknown	-	truncated contig	96	TCATA	-	GACTA	1656	48	-	truncated contig	168	na	na	na
C00022055	ecol	75P1	15	110382	chromosomal	-	unknown seq	3	TAATA	-	GACTA	1656	48	-	IS26 L IRR	2318	na	na	na
C00022056	ecol	84P1	15	110468	chromosomal	-	unknown seq	3	TAATA	-	GACTA	1656	48	-	IS26 L IRR	2318	na	na	na
C00022061	ecol	90P1	15	222920	chromosomal	TCTCA	-	2125	TCATA	-	GACTA	1656	48	TCTCA	-	2902	na	na	na	full CTX-M/Tn3 complex
C00021994	ecol	112P2	15	137141	chromosomal	-	unknown seq	3	TAATA	-	GACTA	1656	48	-	IS26 L IRR	2318	na	na	na
C00022043	ecol	182P1	55	1583	unknown	-	-	-	-	truncated contig	GACTA	90	48	-	truncated contig	250	na	na	na
C00021968	ecol	76P1	55	166382	chromosomal	-	unknown seq	2	TATTA	-	GACTA	1656	48	TAAAA	-	2902	na	na	na
C00021958	ecol	56P1	55	1278	unknown	-	-	-	-	truncated contig	GACTA	96	48	-	-	-	na	na	na	ORF477 truncated by IS26 R IRR
C00022053	ecol	187P1	55	1777	unknown	-	-	-	-	IS26 L IRR	GACTA	267	48	-	truncated contig	170	na	na	na
C00021951	ecol	40P1	55	9803	unknown	-	-	-	-	IS26 R IRR	GACTA	309	48	TAAAA	-	2902	na	na	na
C00021965	ecol	66P1	55	11760	unknown	-	-	-	-	IS26 R IRR	GACTA	309	48	TAAAA	-	2902	na	na	na
C00022447	ecol	22P2	55	9803	unknown	-	-	-	-	IS26 R IRR	GACTA	309	48	TAAAA	-	2902	na	na	na
C00021976	ecol	86P2	55	4838	unknown	-	-	-	-	IS26 R IRR	GACTA	497	48	GATAA	-	2902	na	na	na
C00021981	ecol	99P1	55	4219	unknown	-	-	-	-	IS26 R IRR	GACTA	497	48	-	IS26 L IRR	2318	na	na	na
C00022008	ecol	139P2	55	2052	unknown	-	-	-	-	IS26 R IRR	GACTA	497	48	-	truncated contig	192	na	na	na
C00022058	ecol	85P1	55	2004	unknown	-	-	-	-	IS26 R IRR	GACTA	497	48	-	truncated contig	168	na	na	na
C00022065	ecol	142P1	55	72328	chromosomal	TTGTA	-	2929	-	IS26 R IRR	GACTA	497	48	TACTA	-	2902	na	na	na	modified ISSwi1 structure with IS26 inserted on L side between ISSwi1 and ISEcp1
C00022428	ecol	4P2	55	9992	unknown	-	-	-	-	IS26 R IRR	GACTA	497	48	TAAAA	-	2902	na	na	na
C00022452	ecol	25P2	55	10975	plasmid	-	-	-	-	IS26 R IRR	GACTA	497	48	AAGCT	-	2902	na	na	na
C00022455	ecol	28P1	55	4833	unknown	-	-	-	-	IS26 R IRR	GACTA	497	48	GATAA	-	2902	na	na	na
C00021983	ecol	101P1	55	23324	likely plasmid	-	unknown seq	1	TAACA	-	GACTA	1656	48	-	unknown seq	151	na	na	na
C00021995	ecol	120P1	55	2972	unknown	-	truncated contig	0	TCATA	-	GACTA	1656	48	-	truncated contig	73	na	na	na
C00021997	ecol	121P1	55	23324	likely plasmid	-	unknown seq	1	TAACA	-	GACTA	1656	48	-	unknown seq	151	na	na	na
C00022007	ecol	139P1	55	7536	unknown	GATTC	unknown seq	2125	TCATA	-	GACTA	1656	48	-	IS26 L IRR	2318	na	na	na
C00022033	ecol	2P1	55	188224	plasmid	TACTC	-	2125	TCATA	-	GACTA	1656	48	TAAAA	-	2902	na	na	na	full CTX-M/Tn3 complex
C00022068	ecol	173P1	55	166386	chromosomal	-	unknown seq	2	TATTA	-	GACTA	1656	48	TAAAA	-	2902	na	na	na
C00022430	ecol	6P1	55	166389	chromosomal	-	unknown seq	2	TATTA	-	GACTA	1656	48	TAAAA	-	2902	na	na	na
C00022439	ecol	12P1	55	15189	unknown	GATTC	-	2125	TCATA	-	GACTA	1656	48	-	IS26 L IRR	2318	na	na	na
C00022036	ecol	181P2	14	41821	plasmid	na	na	na	-	-	GAATA	94	42	na	na	na	481	-	GCGGA + unknown seq
C00021956	ecol	47P1	14	1623	unknown	na	na	na	-	truncated contig	GAATA	96	42	na	na	na	604	-	truncated contig
C00022016	ecol	155P1	14	1653	unknown	na	na	na	-	ISVsa5-like element	GAATA	189	42	na	na	na	166	-	truncated contig
C00022032	ecol	1P1	14	4080	unknown	na	na	na	-	ISVsa5-like element	GAATA	189	42	na	na	na	1054	ACGCG	-
C00022041	ecol	181P1	14	2359	unknown	na	na	na	-	IS1S R IRR	GAATA	1242	42	na	na	na	98	-	truncated contig
C00021962	ecol	64P1	14	10397	plasmid	na	na	na	CATTA	-	GAATA	1656	42	na	na	na	481	-	GATTA + unknown seq
C00021977	ecol	86P1	14	71866	chromosomal	na	na	na	AAATA	-	GAATA	1656	42	na	na	na	1054	ACGCG	-
C00022010	ecol	141P1	14	6968	unknown	na	na	na	TAAAA	-	GAATA	1656	42	na	na	na	1054	ACGCG	-
C00022026	ecol	163P1	14	18098	plasmid	na	na	na	CATTA	-	GAATA	1656	42	na	na	na	481	-	GATTA + unknown seq
C00022069	ecol	173P2	14	14369	plasmid	na	na	na	CATTA	-	GAATA	1656	42	na	na	na	481	-	GATTA + unknown seq
C00022437	ecol	10P1	14	50213	plasmid	na	na	na	GCCGA	-	GAATA	1656	42	na	na	na	481	-	GCGGA + unknown seq
C00021941	ecol	36P1	14	3023	unknown	na	na	na	----A	truncated contig	GAATA	1656	42	na	na	na	443	-	truncated contig
C00021978	ecol	88P2	14	71848	chromosomal	na	na	na	AAATA	-	GAATA	1656	42	na	na	na	1054	ACGCG	-
C00021999	ecol	126P1	14	3040	unknown	na	na	na	-	truncated contig	GAATA	1656	42	na	na	na	461	-	truncated contig
C00022443	ecol	19P1	14	5543	unknown	na	na	na	CATTA	-	GAATA	1656	42	na	na	na	481	-	GATTA + unknown seq
C00022043	ecol	182P1	24	237815	chromosomal	na	na	na	-	truncated contig	GAATA	90	42	na	na	na	481	-	GCGGA + unknown seq
C00021966	ecol	66P2	24	238076	chromosomal	na	na	na	TATAT	-	GAATA	1656	42	na	na	na	481	-	GATTA + unknown seq
C00022451	ecol	25P1	24	9998	plasmid	na	na	na	CATTA	-	GAATA	1656	42	na	na	na	481	-	GATTA + unknown seq
C00021968	ecol	76P1	27	4016	unknown	na	na	na	-	IS26 L IRR	GAATA	388	42	na	na	na	1054	ACGCG	-
C00022442	ecol	18P1	27	1337	unknown	na	na	na	-	IS26 L IRR	GAATA	149	42	na	na	na	145	-	truncated contig
C00022456	ecol	29P1	27	13440	unknown	na	na	na	-	IS26 L IRR	GAATA	149	42	na	na	na	1054	ACGCG	-
C00022458	ecol	34P1	27	1304	unknown	na	na	na	-	IS26 L IRR	GAATA	192	42	na	na	na	93	-	truncated contig
C00021986	ecol	102P2	27	4268	unknown	na	na	na	-	IS26 L IRR	GAATA	208	42	na	na	na	1054	ACGCG	-
C00022444	ecol	20P1	27	1466	unknown	na	na	na	-	IS26 L IRR	GAATA	208	42	na	na	na	218	-	truncated contig
C00022446	ecol	22P1	27	1705	unknown	na	na	na	-	IS26 L IRR	GAATA	208	42	na	na	na	388	-	IS26 L IRR
C00022024	ecol	161P2	27	4025	unknown	na	na	na	-	IS26 L IRR	GAATA	388	42	na	na	na	1054	ACGCG	-
C00022039	ecol	151P2	27	1503	unknown	na	na	na	-	IS26 L IRR	GAATA	388	42	na	na	na	95	-	truncated contig
C00022435	ecol	9P1	27	4033	unknown	na	na	na	-	IS26 L IRR	GAATA	388	42	na	na	na	1054	ACGCG	-
C00022453	ecol	27P1	27	4033	unknown	na	na	na	-	IS26 L IRR	GAATA	388	42	na	na	na	1054	ACGCG	-
C00021979	ecol	93P1	27	4025	unknown	na	na	na	-	IS26 L IRR	GAATA	388	42	na	na	na	1054	ACGCG	-
C00021943	ecol	38P1	truncated 55 - context not assessed	1945, 1107	-	-	-	-	-	-	-	-	-	-	-	-	na	na	na
